# Supplementary material for: A central role for TOR signalling in a yeast model for juvenile CLN3 disease
Source: PubMed Central journal article supplement (PMC5354605; doi:10.15698/mic2015.12.241), 2015-11-11
Supplement: mic-02-466-s01.pdf [file mic-02-466-s01.pdf]

## A central role for TOR signalling in a yeast model for juvenile CLN3 disease

Michael E. Bond,<sup>1</sup> Rachel Brown,<sup>1</sup> Charalampos Rallis,<sup>3,4</sup> Jürg Bähler,<sup>3,4</sup> and Sara E. Mole<sup>1,2,3\*</sup>

<sup>1</sup>MRC Laboratory for Molecular Cell Biology, <sup>2</sup>Institute of Child Health, <sup>3</sup>Department of Genetics, Evolution and Environment, and

<sup>4</sup>Institute of Healthy Ageing, University College London, London WC1E 6BT, UK

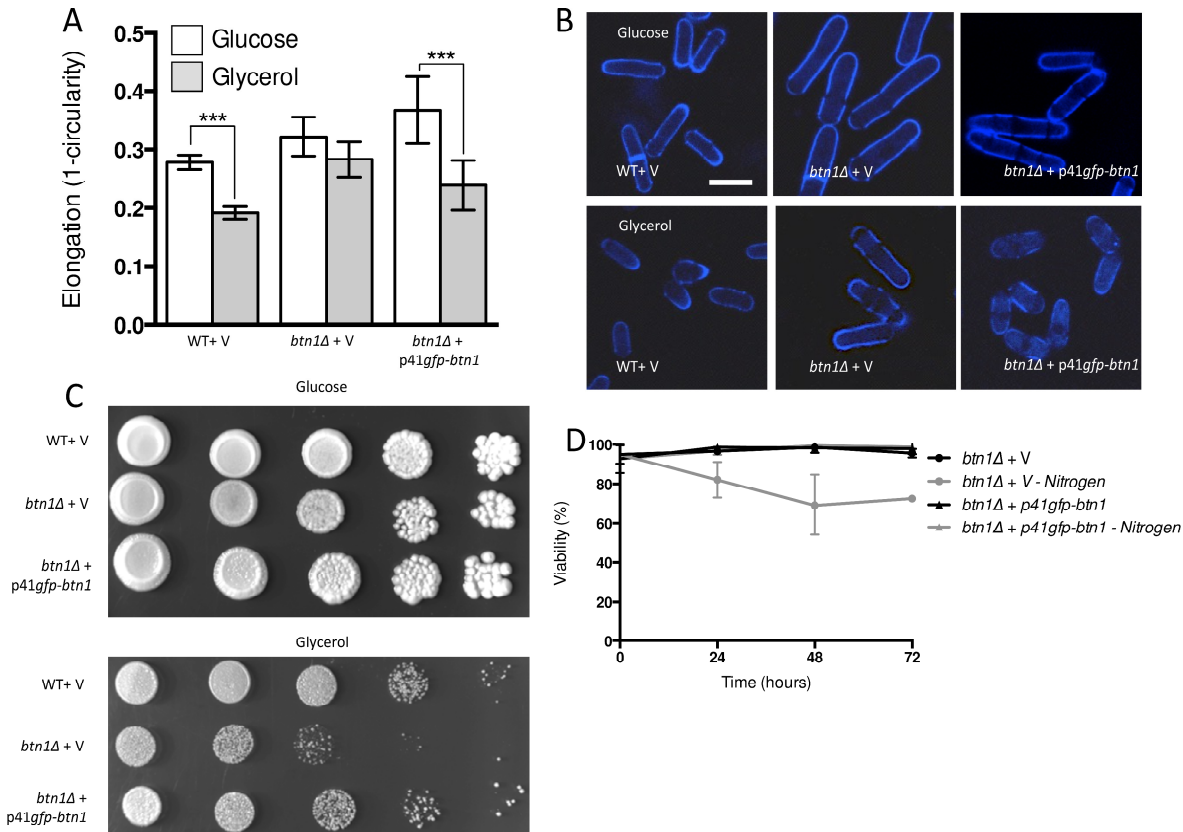

**Figure S1. Overexpression of *btn1* rescues tor-related phenotypes in cells lacking *btn1*.**

(A) Cells lacking *btn1* were transformed with an expression vector containing *gfp-btn1*. The morphological response of this population, in addition to wild-type and *btn1Δ* cells containing empty vector, to growth on glycerol (glucose-limitation) was analysed following 6 hours in culture using a measure of cell elongation, on a scale of 0 to 1, where 0 represents a perfectly round cell ( $1 - \frac{4\pi \text{ area}}{\text{perimeter}^2}$ ). Data shown is a mean ( $\pm$ SEM) of 5 independent experiments. Statistical significance between each condition was determined using a one-way ANOVA with a Tukey's multiple comparison post-test (\*\*\*) =  $p < 0.001$ ). (B) Representative images of experiments performed as in (A) are shown. Scale bar represents 10  $\mu$ m. (C) These cells were serially diluted from a log-phase culture ( $1 \times 10^6$  cells/ml) and spotted onto plates containing either glucose or glycerol as a carbon source. Plates were then incubated at 30°C for 6-7 days to determine growth under non-fermentative conditions. (D) Viability upon nitrogen limitation was determined over periods of up to 72 hours in these cell populations, using the cell impermeant nucleotide stain propidium iodide to stain dead cells and calcofluor white to stain the total cell population. Cells were cultured in either MM or MM lacking a nitrogen source ( $\text{NH}_4\text{Cl}$ ). Data shown is a mean ( $\pm$ SEM) of 3 independent experiments.

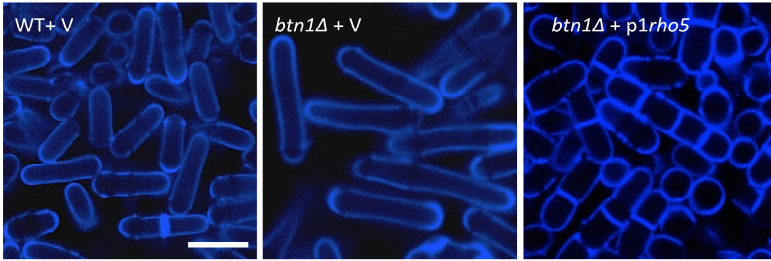

**Figure S2. Overexpression of *rho5* leads to septation and morphology defects.**

Cells lacking *btn1* were transformed with an expression vector containing *rho5*. These cells, in addition to wild-type and *btn1Δ* cells containing empty vector, were cultured for 24 hours, stained with calcofluor white to visualize the cell wall and then imaged to assess morphology and septation. Scale bar represents 10  $\mu\text{m}$ .

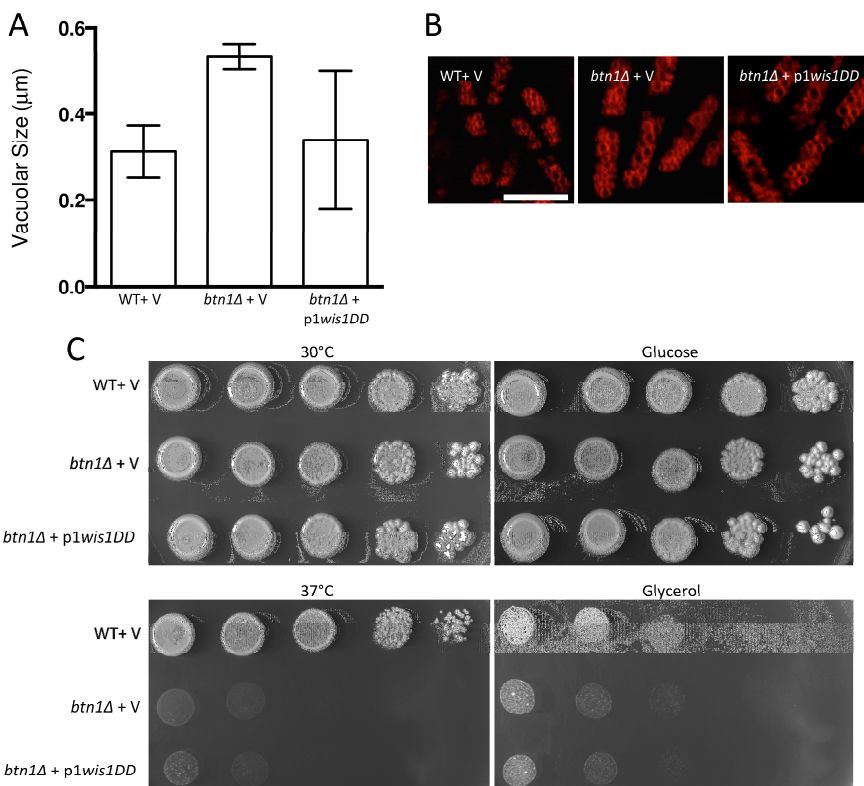

**Figure S3. Activation of the SAPK pathway with overexpressing a constitutively active *wis1* (*wis1DD*) does not rescue *btn1Δ* phenotypes.**

**(A)** Cells lacking *btn1* were transformed with an expression vector containing a constitutive form of *wis1* (*wis1DD*). Vacuole size was measured in these cells, in addition to wild-type and *btn1Δ* cells containing empty vector, following staining with the vital dye FM4-64. Data shown is a mean ( $\pm$ SEM) of 4 independent experiments. Statistical analysis was performed using a one-way ANOVA with a Tukey's multiple comparison post-test. **(B)** Representative images of experiments performed as in (A) are shown. Scale bar represents 10  $\mu\text{m}$ . **(C)** These cells were serially diluted from a log-phase culture ( $1 \times 10^6$  cells/ml) and spotted onto YES plates. Plates were then incubated at 30°C or 37°C for 3-4 days to determine growth at high temperature. They were also spotted onto plates containing either glucose or glycerol as a carbon source. Plates were then incubated at 30°C for 6-7 days to determine growth under non-fermentative conditions.

**Table S1A: Negative Interactors of *btn1***

| ID           | Name         | Description                                                           |
|--------------|--------------|-----------------------------------------------------------------------|
| SPAC1002.07c | ats1         | N-acetyltransferase Ats1 (predicted)                                  |
| SPAC11G7.01  | SPAC11G7.01  | serine-rich Schizosaccharomyces specific protein                      |
| SPAC1250.04c | atl1         | alkyltransferase-like protein Atl1                                    |
| SPAC1296.01c | SPAC1296.01c | phosphoacetylglucosamine mutase (predicted)                           |
| SPAC1399.04c | SPAC1399.04c | uracil phosphoribosyltransferase (predicted)                          |
| SPAC13D6.01  | pof14        | F-box protein Pof14                                                   |
| SPAC13D6.02c | byr3         | translational activator, zf-CCHC type zinc finger protein (predicted) |
| SPAC13D6.04c | btb3         | substrate adaptor for cullin 3 ubiquitin ligase Btb3                  |
| SPAC13F5.01c | msh1         | mitochondrial MutS protein Msh1 (predicted)                           |
| SPAC13F5.03c | gld1         | mitochondrial glycerol dehydrogenase Gld1                             |
| SPAC13F5.04c | vta1         | Vps20 associated protein Vta1 (predicted)                             |
| SPAC13F5.05  | SPAC13F5.05  | thioredoxin family protein (predicted)                                |
| SPAC13F5.07c | SPAC13F5.07c | zf PARP type zinc finger protein                                      |
| SPAC13G7.02c | ssa1         | heat shock protein Ssa1 (predicted)                                   |
| SPAC13G7.09c | SPAC13G7.09c | conserved fungal protein                                              |
| SPAC140.03   | arb1         | argonaute inhibitor protein 1                                         |
| SPAC15A10.06 | SPAC15A10.06 | CPA1 sodium ion/proton antiporter (predicted)                         |
| SPAC1783.01  | SPAC1783.01  | methionine synthase reductase (predicted)                             |
| SPAC1783.06c | atg12        | autophagy associated ubiquitin-like modifier Atg12                    |
| SPAC1783.07c | pap1         | transcription factor Pap1/Caf3                                        |
| SPAC17A5.09c | glc9         | protein phosphatase regulatory subunit Glc9 (predicted)               |
| SPAC17A5.16  | ftp105       | Ubp5 interacting protein Ftp105                                       |
| SPAC17A5.18c | rec25        | meiotic recombination protein Rec25                                   |
| SPAC17G6.17  | pof8         | F-box protein Pof8                                                    |
| SPAC17G8.10c | dma1         | mitotic spindle checkpoint ubiquitin ligase Dma1                      |
| SPAC17H9.03c | rdl1         | RAD51D-like protein 1                                                 |
| SPAC17H9.04c | SPAC17H9.04c | RNA-binding protein                                                   |
| SPAC17H9.06c | SPAC17H9.06c | conserved eukaryotic protein                                          |
| SPAC17H9.11  | gmf1         | cofilin/tropomyosin family Glia Maturation Factor homolog Gmf1        |
| SPAC17H9.12c | SPAC17H9.12c | mitochondrial cytochrome c-heme linkage protein Cyc2 (predicted)      |
| SPAC17H9.14c | pdi2         | protein disulfide isomerase                                           |
| SPAC18G6.01c | SPAC18G6.01c | chalcone related protein family                                       |
| SPAC18G6.02c | chp1         | chromodomain protein Chp1                                             |
| SPAC18G6.05c | SPAC18G6.05c | translation elongation regulator Gcn1 (predicted)                     |
| SPAC18G6.10  | lem2         | LEM domain protein Heh1/Lem2                                          |
| SPAC18G6.12c | SPAC18G6.12c | ThiJ domain protein (predicted)                                       |
| SPAC18G6.13  | SPAC18G6.13  | Schizosaccharomyces specific protein                                  |
| SPAC19A8.04  | erg5         | C-22 sterol desaturase Erg5                                           |
| SPAC1A6.04c  | plb1         | phospholipase B homolog Plb1                                          |

|               |               |                                                                                                       |
|---------------|---------------|-------------------------------------------------------------------------------------------------------|
| SPAC1B3.01c   | SPAC1B3.01c   | uracil phosphoribosyltransferase (predicted)                                                          |
| SPAC1B3.05    | not3          | CCR4-Not complex subunit Not3/5 (predicted)                                                           |
| SPAC1D4.03c   | aut12         | autophagy associated protein Aut12 (predicted)                                                        |
| SPAC20G4.07c  | sts1          | C-24(28) sterol reductase Sts1                                                                        |
| SPAC20H4.03c  | tfs1          | transcription elongation factor TFIIIS                                                                |
| SPAC20H4.04   | fml2          | ATP-dependent 3' to 5' DNA helicase (predicted)                                                       |
| SPAC20H4.05c  | SPAC20H4.05c  | 5'-methylthioribulose-1-phosphate dehydratase, adducin (predicted)                                    |
| SPAC20H4.06c  | SPAC20H4.06c  | RNA-binding protein                                                                                   |
| SPAC20H4.09   | SPAC20H4.09   | ATP-dependent RNA helicase, spliceosomal (predicted)                                                  |
| SPAC20H4.10   | ufd2          | ubiquitin-protein ligase E4 (predicted)                                                               |
| SPAC20H4.11c  | rho5          | Rho family GTPase Rho5                                                                                |
| SPAC22H10.04  | ppa3          | protein phosphatase type 2A Ppa1                                                                      |
| SPAC23C11.01  | SPAC23C11.01  | ER membrane protein, ICE2 family                                                                      |
| SPAC23C11.06c | SPAC23C11.06c | hydrolase (inferred_from_context)                                                                     |
| SPAC23C11.07  | SPAC23C11.07  | Schizosaccharomyces pombe specific protein                                                            |
| SPAC23C11.14  | zhf1          | zinc ion transporter Zhf1                                                                             |
| SPAC23E2.01   | fep1          | iron-sensing transcription factor Fep1                                                                |
| SPAC23H3.11c  | SPAC23H3.11c  | glucosidase (predicted)                                                                               |
| SPAC25A8.02   | atg14         | autophagy protein Atg14                                                                               |
| SPAC32A11.02c | SPAC32A11.02c | conserved fungal protein                                                                              |
| SPAC32A11.03c | phx1          | stationary phase-specific homeobox transcription factor Phx1                                          |
| SPAC3C7.01c   | sac12         | inositol polyphosphate phosphatase (predicted)                                                        |
| SPAC3C7.02c   | pil2          | meiotic eisosome BAR domain protein Pil2                                                              |
| SPAC3C7.04    | SPAC3C7.04    | transcription factor (predicted)                                                                      |
| SPAC3C7.05c   | mug191        | alpha-1,6- mannanase (predicted)                                                                      |
| SPAC3C7.06c   | pit1          | serine/threonine protein kinase, meiotic Pit1                                                         |
| SPAC3C7.07c   | SPAC3C7.07c   | arginine-tRNA protein transferase (predicted)                                                         |
| SPAC3C7.09    | set8          | lysine methyltransferase Set8 (predicted)                                                             |
| SPAC3C7.10    | pex13         | peroxin 13 (predicted)                                                                                |
| SPAC3C7.12    | tip1          | CLIP170 family protein Tip1                                                                           |
| SPAC3C7.13c   | SPAC3C7.13c   | glucose-6-phosphate 1-dehydrogenase (predicted)                                                       |
| SPAC3H1.06c   | SPAC3H1.06c   | membrane transporter (predicted)                                                                      |
| SPAC3H1.10    | pcs2          | phytochelatin synthetase                                                                              |
| SPAC3H1.12c   | snt2          | Lid2 complex subunit Snt2                                                                             |
| SPAC3H1.13    | ppk13         | serine/threonine protein kinase Ppk13 (predicted)                                                     |
| SPAC3H1.14    | SPAC3H1.14    | cytoplasmic vesicle protein, Vid24 family (predicted)                                                 |
| SPAC4G9.02    | rnh201        | ribonuclease H2 complex subunit Rnh201 (predicted)                                                    |
| SPAC4G9.06c   | chz1          | histone chaperone Chz1 (predicted)                                                                    |
| SPAC4G9.09c   | arg11         | N-acetyl-gamma-glutamyl-phosphate reductase/acetylglutamate kinase                                    |
| SPAC4G9.13c   | vps26         | retromer complex subunit Vps26                                                                        |
| SPAC4G9.14    | SPAC4G9.14    | mitochondrial Mpv17/PMP22 family protein 2 (predicted)                                                |
| SPAC4G9.20c   | SPAC4G9.20c   | mitochondrial carrier with solute carrier repeats, organic acid transmembrane transporter (predicted) |

|               |              |                                                                                           |
|---------------|--------------|-------------------------------------------------------------------------------------------|
| SPAC56F8.02   | SPAC56F8.02  | AMP binding enzyme (predicted)                                                            |
| SPAC589.05c   | SPAC589.05c  | queuosine salvage protein                                                                 |
| SPAC607.06c   | SPAC607.06c  | metallopeptidase (predicted)                                                              |
| SPAC607.07c   | SPAC607.07c  | Schizosaccharomyces specific protein                                                      |
| SPAC607.10    | spo3         | sporulation protein Spo3                                                                  |
| SPAC631.01c   | acp2         | F-actin capping protein beta subunit Acp2                                                 |
| SPAC631.02    | bdf2         | BET family double bromodomain protein Bdf2                                                |
| SPAC664.01c   | swi6         | HP1 family chromodomain protein Swi6                                                      |
| SPAC6C3.04    | cit1         | citrate synthase Cit1                                                                     |
| SPAC6C3.05    | SPAC6C3.05   | Schizosaccharomyces specific protein                                                      |
| SPAC6C3.07    | mug68        | Schizosaccharomyces specific protein Mug68                                                |
| SPAC6F12.06   | SPAC6F12.06  | Rho GDP dissociation inhibitor Rdi1 (predicted)                                           |
| SPAC6F12.09   | rdp1         | RNA-directed RNA polymerase Rdp1                                                          |
| SPAC6G10.06   | SPAC6G10.06  | FAD-dependent amino acid oxidase involved in late endosome to Golgi transport (predicted) |
| SPAC732.02c   | SPAC732.02c  | fructose-2,6-bisphosphate 2-phosphatase activity (predicted)                              |
| SPAC767.01c   | vps1         | dynamamin family protein Vps1                                                             |
| SPAC922.05c   | SPAC922.05c  | membrane transporter (predicted)                                                          |
| SPAC9G1.02    | wis4         | MAP kinase kinase kinase Wis4                                                             |
| SPAC9G1.04    | oxa101       | mitochondrial inner membrane translocase Oxa101                                           |
| SPAC9G1.05    | aip1         | actin cortical patch component Aip1                                                       |
| SPAC9G1.06c   | cyk3         | cytokinesis protein Cyk3 (predicted)                                                      |
| SPAC9G1.07    | SPAC9G1.07   | Schizosaccharomyces specific protein                                                      |
| SPAC9G1.08c   | SPAC9G1.08c  | phospholipase (predicted)                                                                 |
| SPAC9G1.10c   | SPAC9G1.10c  | inositol polyphosphate phosphatase (predicted)                                            |
| SPAC9G1.11c   | spn4         | septin Spn4                                                                               |
| SPAC9G1.12    | cpd1         | tRNA (m1A) methyltransferase complex catalytic subunit Cpd1                               |
| SPAP11E10.01  | SPAP11E10.01 | ornithine cyclodeaminase family (predicted)                                               |
| SPAP14E8.04   | oma1         | metallopeptidase Oma1 (predicted)                                                         |
| SPAP27G11.02  | SPAP27G11.02 | TPR repeat protein, involved in mitochondrial protein turnover (predicted)                |
| SPAPB1A10.05  | SPAPB1A10.05 | Schizosaccharomyces specific protein                                                      |
| SPAPB1A10.12c | alo1         | D-arabinono-1,4-lactone oxidase (predicted)                                               |
| SPAPB1A10.14  | pof15        | F-box protein (predicted)                                                                 |
| SPBC1105.14   | rsv2         | transcription factor Rsv2                                                                 |
| SPBC11G11.03  | mrt4         | mRNA turnover and ribosome assembly protein Mrt4 (predicted)                              |
| SPBC1604.12   | SPBC1604.12  | Schizosaccharomyces specific phosphoprotein                                               |
| SPBC1652.02   | SPBC1652.02  | APC amino acid transporter (predicted)                                                    |
| SPBC1709.11c  | png2         | ING family homolog Png2                                                                   |
| SPBC26H8.03   | cho2         | phosphatidylethanolamine N-methyltransferase Cho2                                         |
| SPBC26H8.05c  | pph3         | serine/threonine protein phosphatase, PP4 complex subunit Pph3 (predicted)                |
| SPBC2D10.17   | clr1         | cryptic loci regulator Clr1                                                               |
| SPBC2G2.03c   | sbh1         | translocon beta subunit Sbh1 (predicted)                                                  |
| SPBC30D10.10c | tor1         | phosphatidylinositol kinase Tor1                                                          |

|              |             |                                                       |
|--------------|-------------|-------------------------------------------------------|
| SPBC409.07c  | wis1        | MAP kinase kinase Wis1                                |
| SPBC428.03c  | pho4        | thiamine-repressible acid phosphatase Pho4            |
| SPBC428.06c  | rxt2        | histone deacetylase complex subunit Rxt2              |
| SPBC543.03c  | pku80       | Ku domain protein Pku80                               |
| SPBC56F2.03  | SPBC56F2.03 | actin-like protein Arp10 (predicted)                  |
| SPCC126.15c  | sec65       | signal recognition particle subunit Sec65 (predicted) |
| SPCC1902.01  | gaf1        | transcription factor Gaf1                             |
| SPCC24B10.22 | pog1        | mitochondrial DNA polymerase gamma                    |

**Table S1B: Positive Interactors of *btn1***

| ID            | Name          | Description                                                        |
|---------------|---------------|--------------------------------------------------------------------|
| SPAC1006.03c  | red1          | RNA elimination defective protein Red1                             |
| SPAC1071.04c  | spc2          | signal peptidase subunit Spc2 (predicted)                          |
| SPAC1071.08   | rpp203        | 60S acidic ribosomal protein A2                                    |
| SPAC1142.07c  | vps32         | ESCRT III complex subunit Vps32                                    |
| SPAC1142.08   | fhl1          | forkhead transcription factor Fhl1                                 |
| SPAC11E3.08c  | nse6          | Smc5-6 complex non-SMC subunit Nse6                                |
| SPAC13G6.02c  | rps101        | 40S ribosomal protein S3a                                          |
| SPAC13G6.09   | SPAC13G6.09   | SSU-rRNA maturation protein Tsr4 homolog 2 (predicted)             |
| SPAC144.04c   | spe1          | ornithine decarboxylase Spe1 (predicted)                           |
| SPAC144.11    | rps1102       | 40S ribosomal protein S11 (predicted)                              |
| SPAC1486.01   | SPAC1486.01   | manganese superoxide dismutase (predicted)                         |
| SPAC1527.02   | sft2          | Golgi transport protein Sft2 (predicted)                           |
| SPAC1782.05   | ypa2          | protein phosphatase type 2A regulator, PTPA family Ypa2            |
| SPAC1782.11   | met14         | adenylyl-sulfate kinase (predicted)                                |
| SPAC17A5.07c  | ulp2          | SUMO deconjugating cysteine peptidase Ulp2 (predicted)             |
| SPAC17C9.14   | SPAC17C9.14   | Pex19 protein (predicted)                                          |
| SPAC17G8.13c  | mst2          | histone acetyltransferase Mst2                                     |
| SPAC1851.02   | slc1          | 1-acylglycerol-3-phosphate O-acyltransferase Slc1 (predicted)      |
| SPAC1851.03   | ckb1          | CK2 family regulatory subunit Ckb1                                 |
| SPAC19B12.11c | SPAC19B12.11c | zinc finger protein, human ZNF593 ortholog                         |
| SPAC1B2.04    | cox6          | cytochrome c oxidase subunit VI (predicted)                        |
| SPAC1B3.16c   | vht1          | vitamin H transporter Vht1                                         |
| SPAC1F12.07   | SPAC1F12.07   | phosphoserine aminotransferase (predicted)                         |
| SPAC20G4.04c  | hus1          | checkpoint clamp complex protein Hus1                              |
| SPAC222.08c   | SPAC222.08c   | glutamine aminotransferase subunit (predicted)                     |
| SPAC227.01c   | erd1          | Erd1 homolog (predicted)                                           |
| SPAC227.05    | SPAC227.05    | prefoldin subunit 4 (predicted)                                    |
| SPAC22A12.04c | rps2201       | 40S ribosomal protein S15a (predicted)                             |
| SPAC22F8.09   | rrp16         | rRNA processing protein Rrp16 (predicted)                          |
| SPAC22H10.11c | SPAC22H10.11c | TOR signaling pathway transcriptional corepressor Crf1 (predicted) |

|               |              |                                                                                                  |
|---------------|--------------|--------------------------------------------------------------------------------------------------|
| SPAC23C11.04c | pnk1         | DNA kinase/phosphatase Pnk1                                                                      |
| SPAC23C11.13c | hpt1         | xanthine phosphoribosyltransferase (predicted)                                                   |
| SPAC23G3.05c  | SPAC23G3.05c | regulator of G-protein signaling (RGS) domain (predicted)                                        |
| SPAC23H3.13c  | gpa2         | heterotrimeric G protein alpha-2 subunit Gpa2                                                    |
| SPAC24B11.13  | hem3         | hydroxymethylbilane synthase Hem3 (predicted)                                                    |
| SPAC24H6.03   | cul3         | cullin 3                                                                                         |
| SPAC25A8.01c  | fft3         | SMARCAD1 family ATP-dependent DNA helicase Fft3                                                  |
| SPAC25G10.06  | rps2801      | 40S ribosomal protein S28 (predicted)                                                            |
| SPAC25H1.07   | emc1         | ER membrane protein complex subunit Emc1 (predicted)                                             |
| SPAC26A3.06   | bud23        | rRNA (guanine) methyltransferase Bud23 (predicted)                                               |
| SPAC26H5.05   | mga2         | IPT/TIG ankyrin repeat containing transcription regulator of fatty acid biosynthesis (predicted) |
| SPAC30.02c    | SPAC30.02c   | elongator complex associated protein Kti2 (predicted)                                            |
| SPAC30.03c    | tsn1         | translin                                                                                         |
| SPAC30C2.07   | SPAC30C2.07  | Schizosaccharomyces specific protein                                                             |
| SPAC31G5.11   | pac2         | cAMP-independent regulatory protein Pac2                                                         |
| SPAC31G5.17c  | rps1001      | 40S ribosomal protein S10 (predicted)                                                            |
| SPAC323.05c   | SPAC323.05c  | protein methyltransferase Mtq2 (predicted)                                                       |
| SPAC328.10c   | rps502       | 40S ribosomal protein S5 (predicted)                                                             |
| SPAC343.16    | lys2         | homoaconitate hydratase Lys2                                                                     |
| SPAC343.19    | lsb6         | 1-phosphatidylinositol 4-kinase Lsb6 (predicted)                                                 |
| SPAC3A12.10   | rpl2001      | 60S ribosomal protein L20a (predicted)                                                           |
| SPAC3A12.13c  | SPAC3A12.13c | translation initiation factor eIF3j (p35)                                                        |
| SPAC3G9.08    | png1         | ING family homolog Png1                                                                          |
| SPAC3H8.05c   | mms1         | E3 ubiquitin ligase complex subunit Mms1 (predicted)                                             |
| SPAC3H8.07c   | pac10        | prefoldin subunit 3 Pac10 (predicted)                                                            |
| SPAC4F10.19c  | SPAC4F10.19c | zf-HIT protein Hit1 (predicted)                                                                  |
| SPAC4G9.15    | SPAC4G9.15   | ketoreductase (predicted)                                                                        |
| SPAC521.05    | rps802       | 40S ribosomal protein S8 (predicted)                                                             |
| SPAC56F8.09   | rrp8         | rRNA methyltransferase Rrp8 (predicted)                                                          |
| SPAC57A10.12c | ura3         | dihydroorotate dehydrogenase Ura3                                                                |
| SPAC5H10.06c  | adh4         | alcohol dehydrogenase Adh4                                                                       |
| SPAC630.14c   | tup12        | transcriptional corepressor Tup12                                                                |
| SPAC637.10c   | rpn10        | 19S proteasome regulatory subunit Rpn10                                                          |
| SPAC664.02c   | arp8         | actin-like protein, Ino80 complex subunit Arp8                                                   |
| SPAC6B12.02c  | mus7         | DNA repair protein Mus7/Mms22                                                                    |
| SPAC6G10.08   | idp1         | isocitrate dehydrogenase Idp1 (predicted)                                                        |
| SPAC824.04    | SPAC824.04   | WD repeat protein (predicted)                                                                    |
| SPAC890.05    | SPAC890.05   | ribosome biogenesis protein, G-patch domain, PINX1 family (predicted)                            |
| SPAC8C9.07    | SPAC8C9.07   | rRNA processing protein Fyv7 (predicted)                                                         |
| SPAC8C9.19    | SPAC8C9.19   | conserved fungal protein                                                                         |
| SPAC8F11.02c  | dph3         | diphthamide biosynthesis protein Dph3 (predicted)                                                |
| SPAC9.12c     | atp12        | F1-ATPase chaperone Atp12 (predicted)                                                            |

|               |               |                                                                                    |
|---------------|---------------|------------------------------------------------------------------------------------|
| SPAC9.13c     | cwf16         | splicing factor Cwf16                                                              |
| SPAC926.03    | rlc1          | myosin II regulatory light chain Rlc1                                              |
| SPAC959.06c   | SPAC959.06c   | conserved fungal protein                                                           |
| SPAP27G11.14c | SPAP27G11.14c | Schizosaccharomyces pombe specific protein                                         |
| SPAP7G5.05    | rpl1002       | 60S ribosomal protein L10                                                          |
| SPAP8A3.07c   | SPAP8A3.07c   | phospho-2-dehydro-3-deoxyheptonate aldolase (predicted)                            |
| SPAPB1E7.06c  | eme1          | Holliday junction resolvase subunit Eme1                                           |
| SPBC106.10    | pka1          | cAMP-dependent protein kinase catalytic subunit Pka1                               |
| SPBC106.17c   | cys2          | homoserine O-acetyltransferase (predicted)                                         |
| SPBC119.12    | rud3          | Golgi matrix protein Rud3 (predicted)                                              |
| SPBC1198.08   | SPBC1198.08   | dipeptidase Dug1 (predicted)                                                       |
| SPBC1271.15c  | SPBC1271.15c  | mitochondrial translation initiation factor IF-2Mt (predicted)                     |
| SPBC12C2.12c  | glo1          | glyoxalase I                                                                       |
| SPBC12D12.09  | rev7          | DNA polymerase zeta Rev7 (predicted)                                               |
| SPBC13G1.10c  | mug81         | ATP-dependent RNA helicase Slh1 (predicted)                                        |
| SPBC1539.10   | nop16         | ribosome biogenesis protein Nop16 (predicted)                                      |
| SPBC15C4.01c  | oca3          | TPR repeat protein Oca3/ ER membrane protein complex Ecm2 (predicted)              |
| SPBC16D10.11c | rps1801       | 40S ribosomal protein S18 (predicted)                                              |
| SPBC16E9.12c  | pab2          | poly(A) binding protein Pab2                                                       |
| SPBC16G5.15c  | fkx2          | forkhead transcription factor Fkh2                                                 |
| SPBC16H5.08c  | SPBC16H5.08c  | ribosome biogenesis ATPase, Arb family ABCF2-like (predicted)                      |
| SPBC1703.12   | ubp9          | ubiquitin C-terminal hydrolase Ubp9                                                |
| SPBC1711.03   | aim27         | ER membrane protein complex subunit Aim27 (predicted)                              |
| SPBC1718.03   | ker1          | DNA-directed RNA polymerase I complex subunit Ker1                                 |
| SPBC1734.12c  | alg12         | dolichyl pyrophosphate Man7GlcNAc2 alpha-1,6-mannosyltransferase Alg12 (predicted) |
| SPBC17A3.06   | SPBC17A3.06   | phosphoprotein phosphatase (predicted)                                             |
| SPBC17D1.06   | dbp3          | ATP-dependent RNA helicase Dbp3 (predicted)                                        |
| SPBC18H10.07  | SPBC18H10.07  | WW domain-binding protein 4 (predicted)                                            |
| SPBC18H10.13  | rps1402       | 40S ribosomal protein S14 (predicted)                                              |
| SPBC19F8.08   | rps401        | 40S ribosomal protein S4 (predicted)                                               |
| SPBC19G7.17   | SPBC19G7.17   | translocon subunit Sec61 homolog (predicted)                                       |
| SPBC1D7.04    | mlo3          | RNA binding protein Mlo3                                                           |
| SPBC20F10.05  | nrl1          | NRDE-2 family protein (predicted)                                                  |
| SPBC211.06    | gfh1          | gamma tubulin complex subunit Gfh1                                                 |
| SPBC215.02    | bob1          | prefoldin subunit 5 (predicted)                                                    |
| SPBC21B10.10  | rps402        | 40S ribosomal protein S4 (predicted)                                               |
| SPBC21B10.13c | yox1          | MBF complex corepressor Yox1                                                       |
| SPBC21C3.20c  | git1          | C2 domain protein Git1                                                             |
| SPBC27B12.10c | tom7          | mitochondrial TOM complex subunit Tom7 (predicted)                                 |
| SPBC27B12.11c | pho7          | transcription factor Pho7                                                          |
| SPBC28E12.04  | SPBC28E12.04  | Schizosaccharomyces specific protein                                               |
| SPBC29A3.02c  | his7          | phosphoribosyl-AMP cyclohydrolase/phosphoribosyl- ATP pyrophosphohydrolase His7    |



|               |               |                                                                             |
|---------------|---------------|-----------------------------------------------------------------------------|
| SPBC2F12.09c  | atf21         | transcription factor, Atf-CREB family Atf21                                 |
| SPBC2G5.02c   | ckb2          | CK2 family regulatory subunit Ckb2 (predicted)                              |
| SPBC2G5.06c   | hmt2          | sulfide-quinone oxidoreductase                                              |
| SPBC30D10.16  | pha2          | phrenate dehydratase                                                        |
| SPBC30D10.18c | rpl102        | 60S ribosomal protein L10a                                                  |
| SPBC32F12.05c | cwf12         | complexed with Cdc5 protein Cwf12                                           |
| SPBC32F12.11  | tdh1          | glyceraldehyde-3-phosphate dehydrogenase Tdh1                               |
| SPBC32H8.07   | git5          | heterotrimeric G protein beta subunit Git5                                  |
| SPBC337.04    | ppk27         | serine/threonine protein kinase Ppk27 (predicted)                           |
| SPBC337.09    | erg28         | Erg28 protein (predicted)                                                   |
| SPBC36.07     | elp1          | elongator subunit Elp1 (predicted)                                          |
| SPBC3B9.13c   | rpp102        | 60S acidic ribosomal protein A3                                             |
| SPBC3D6.04c   | mad1          | mitotic spindle checkpoint protein Mad1                                     |
| SPBC3E7.09    | SPBC3E7.09    | Sad1-UNC-like protein involved protein folding in the ER (predicted)        |
| SPBC530.05    | prt1          | transcription factor (predicted)                                            |
| SPBC56F2.08c  | SPBC56F2.08c  | RNA-binding protein (predicted)                                             |
| SPBC609.05    | pob3          | FACT complex subunit Pob3                                                   |
| SPBC651.09c   | prf1          | RNA polymerase II associated Paf1 complex (predicted)                       |
| SPBC660.07    | ntp1          | alpha,alpha-trehalase Ntp1                                                  |
| SPBC6B1.06c   | ubp14         | ubiquitin C-terminal hydrolase Ubp14                                        |
| SPBC725.01    | SPBC725.01    | aspartate aminotransferase (predicted)                                      |
| SPBC725.14    | arg6          | acetylglutamate synthase Arg6 (predicted)                                   |
| SPBC887.17    | SPBC887.17    | transmembrane transporter (predicted)                                       |
| SPBC8D2.12c   | SPBC8D2.12c   | mitochondrial translational activator of cytochrome C oxidase I (predicted) |
| SPBC8D2.17    | gmh4          | alpha-1,2-galactosyltransferase (predicted)                                 |
| SPBC8D2.18c   | SPBC8D2.18c   | adenosylhomocysteinase (predicted)                                          |
| SPBP35G2.08c  | air1          | zinc knuckle TRAMP complex subunit Air1                                     |
| SPBP4H10.13   | rps2302       | 40S ribosomal protein S23 (predicted)                                       |
| SPBP8B7.10c   | utp16         | U3 snoRNP-associated protein Utp16 (predicted)                              |
| SPBPB7E8.02   | SPBPB7E8.02   | PSP1 family protein                                                         |
| SPCC1020.06c  | tal1          | transaldolase (predicted)                                                   |
| SPCC1020.07   | SPCC1020.07   | haloacid dehalogenase-like hydrolase                                        |
| SPCC1020.10   | oca2          | serine/threonine protein kinase Oca2                                        |
| SPCC1020.11c  | ecm6          | ER membrane protein complex subunit 6 (predicted)                           |
| SPCC1183.02   | SPCC1183.02   | glutathione S-transferase (predicted)                                       |
| SPCC11E10.03  | mug1          | dynactin complex subunit, dynamitin (predicted)                             |
| SPCC11E10.05c | ynd1          | nucleoside diphosphatase Ynd1                                               |
| SPCC11E10.06c | elp4          | elongator complex subunit Elp4 (predicted)                                  |
| SPCC11E10.08  | rik1          | silencing protein Rik1                                                      |
| SPCC11E10.09c | SPCC11E10.09c | alpha-amylase homolog (predicted)                                           |
| SPCC1223.01   | SPCC1223.01   | ubiquitin-protein ligase E3 (predicted)                                     |
| SPCC1223.06   | tea1          | cell end marker Tea1                                                        |

|               |               |                                                                                                          |
|---------------|---------------|----------------------------------------------------------------------------------------------------------|
| SPCC1223.12c  | meu10         | GPI anchored cell surface protein involved in ascospore wall assembly Meu10                              |
| SPCC1235.05c  | fft2          | SMARCAD1 family ATP-dependent DNA helicase Fft2 (predicted)                                              |
| SPCC1235.13   | ght6          | hexose transporter Ght6                                                                                  |
| SPCC1259.03   | rpa12         | DNA-directed RNA polymerase complex I subunit Rpa12                                                      |
| SPCC1259.08   | SPCC1259.08   | conserved fungal protein, DUF2457 family                                                                 |
| SPCC1259.09c  | pdx1          | pyruvate dehydrogenase protein x component, Pdx1 (predicted)                                             |
| SPCC1259.10   | pgp1          | mitochondrial metalloproteinase, tRNA N6-threonyl-carbamoyl-adenosine (t6A), a modification protein Pgp1 |
| SPCC1259.11c  | gyp2          | GTPase activating protein Gyp2 (predicted)                                                               |
| SPCC1259.14c  | meu27         | UPF0300 family protein 5                                                                                 |
| SPCC1281.04   | SPCC1281.04   | pyridoxal reductase (predicted)                                                                          |
| SPCC1281.07c  | SPCC1281.07c  | glutathione S-transferase (predicted)                                                                    |
| SPCC1281.08   | wtf11         | wtf element Wtf11                                                                                        |
| SPCC132.01c   | mtr1          | microtubule regulator Mtr1                                                                               |
| SPCC132.02    | hst2          | Sir2 family histone deacetylase Hst2                                                                     |
| SPCC132.04c   | gdh2          | NAD-dependent glutamate dehydrogenase Gdh2 (predicted)                                                   |
| SPCC1322.02   | pxd1          | structure-specific DNA nuclease regulator Pxd1                                                           |
| SPCC1322.03   | trp1322       | TRP-like ion channel (predicted)                                                                         |
| SPCC1322.06   | kap113        | karyopherin Kap113                                                                                       |
| SPCC1322.07c  | mug150        | Schizosaccharomyces pombe specific protein Mug150                                                        |
| SPCC1322.08   | srk1          | MAPK-activated protein kinase Srk1                                                                       |
| SPCC1322.14c  | vtc4          | vacuolar transporter chaperone (VTC) complex subunit (predicted)                                         |
| SPCC1322.15   | rpl3402       | 60S ribosomal protein L34                                                                                |
| SPCC1322.16   | phb2          | prohibitin Phb2 (predicted)                                                                              |
| SPCC1393.10   | ctr4          | copper transporter complex subunit Ctr4                                                                  |
| SPCC1393.13   | SPCC1393.13   | DUF89 family protein                                                                                     |
| SPCC1450.02   | bdf1          | Swr1 complex bromodomain subunit Brf1                                                                    |
| SPCC162.10    | ppk33         | serine/threonine protein kinase Ppk33 (predicted)                                                        |
| SPCC162.12    | tco89         | TORC1 subunit Tco89                                                                                      |
| SPCC1672.06c  | asp1          | inositol hexakisphosphate kinase/inositol pyrophosphate synthase (predicted)                             |
| SPCC1682.14   | rpl1902       | 60S ribosomal protein L19                                                                                |
| SPCC16A11.01  | SPCC16A11.01  | plasma membrane protein involved in inositol lipid-mediated signaling Sfk1 (predicted)                   |
| SPCC16A11.03c | SPCC16A11.03c | DUF2009 protein                                                                                          |
| SPCC16A11.04  | snx12         | sorting nexin Snx12 (predicted)                                                                          |
| SPCC16A11.07  | coq10         | mitochondrial ubiquinone binding protein Coq10                                                           |
| SPCC16A11.08  | atg20         | sorting nexin Atg20 (predicted)                                                                          |
| SPCC16A11.16c | rpn1302       | 19S proteasome regulatory subunit Rpn13b                                                                 |
| SPCC16C4.04   | SPCC16C4.04   | Schizosaccharomyces specific protein                                                                     |
| SPCC16C4.14c  | sfc4          | transcription factor TFIIIC complex subunit Sfc4                                                         |
| SPCC16C4.17   | mug123        | Schizosaccharomyces specific protein Mug123                                                              |
| SPCC1739.06c  | SPCC1739.06c  | uroporphyrin methyltransferase (predicted)                                                               |
| SPCC1753.02c  | git3          | G-protein coupled receptor Git3                                                                          |
| SPCC1753.03c  | rec7          | meiotic recombination protein Rec7                                                                       |

|               |               |                                                                          |
|---------------|---------------|--------------------------------------------------------------------------|
| SPCC1753.05   | rsm1          | RNA export factor Rsm1                                                   |
| SPCC1795.03   | gms1          | UDP-galactose transporter Gms1                                           |
| SPCC1795.09   | yps1          | aspartic protease, yapsin Yps1                                           |
| SPCC1795.10c  | SPCC1795.10c  | Sed5 Vesicle Protein Svp26 (predicted)                                   |
| SPCC18.17c    | SPCC18.17c    | proteasome assembly chaperone (predicted)                                |
| SPCC1840.03   | sal3          | karyopherin Sal3                                                         |
| SPCC188.02    | par1          | protein phosphatase regulatory subunit Par1                              |
| SPCC188.08c   | ubp5          | ubiquitin C-terminal hydrolase Ubp5                                      |
| SPCC188.09c   | pfl4          | cell surface glycoprotein, adhesion molecule (predicted)                 |
| SPCC188.12    | spn6          | septin Spn6 (predicted)                                                  |
| SPCC18B5.03   | wee1          | M phase inhibitor protein kinase Wee1                                    |
| SPCC18B5.06   | dom34         | peloto ortholog (predicted)                                              |
| SPCC18B5.11c  | cds1          | replication checkpoint kinase Cds1                                       |
| SPCC1906.02c  | cue3          | CUE domain protein Cue3 (predicted)                                      |
| SPCC191.09c   | gst1          | glutathione S-transferase Gst1                                           |
| SPCC1919.05   | SPCC1919.05   | Ski complex TPR repeat subunit Ski3 (predicted)                          |
| SPCC23B6.01c  | SPCC23B6.01c  | oxysterol binding protein (predicted)                                    |
| SPCC23B6.02c  | SPCC23B6.02c  | pre-ribosomal factor (predicted)                                         |
| SPCC23B6.03c  | tel1          | ATM checkpoint kinase                                                    |
| SPCC23B6.05c  | ssb3          | DNA replication factor A subunit Ssb3                                    |
| SPCC24B10.02c | SPCC24B10.02c | NAD/NADH kinase (predicted)                                              |
| SPCC24B10.10c | yta4          | mitochondrial outer membrane ATPase Msp1/Yta4 (predicted)                |
| SPCC24B10.11c | mft1          | THO complex subunit 7 Mft1 (predicted)                                   |
| SPCC24B10.13  | skb5          | Shk1 kinase binding protein 5                                            |
| SPCC24B10.14c | xlf1          | xrcc4 like factor, cernunnon                                             |
| SPCC24B10.15  | SPCC24B10.15  | RNA endoribonuclease involved in mRNP quality control (predicted)        |
| SPCC24B10.16c | SPCC24B10.16c | proteasome assembly chaperone 4 (predicted)                              |
| SPCC24B10.18  | SPCC24B10.18  | human Leydig cell tumor 10 kDa protein homolog                           |
| SPCC24B10.19c | nts1          | Schizosaccharomyces specific protein                                     |
| SPCC24B10.20  | SPCC24B10.20  | short chain dehydrogenase (predicted)                                    |
| SPCC285.09c   | cgs2          | cAMP-specific phosphodiesterase Cgs2                                     |
| SPCC285.15c   | rps2802       | 40S ribosomal protein S28, Rps2802                                       |
| SPCC285.17    | spp27         | RNA polymerase I upstream activation factor complex subunit Spp27        |
| SPCC2H8.05c   | dbl1          | Schizosaccharomyces specific protein, double strand break localizing Db1 |
| SPCC306.07c   | SPCC306.07c   | U3 snoRNP-associated protein Cic1/Utp30 family (predicted)               |
| SPCC306.11    | SPCC306.11    | Schizosaccharomyces specific protein                                     |
| SPCC31H12.02c | mug73         | plasma membrane transmembrane transport regulator (predicted)            |
| SPCC31H12.06  | mug111        | major facilitator family transmembrane transporter Mug111 (predicted)    |
| SPCC320.03    | SPCC320.03    | transcription factor (predicted)                                         |
| SPCC320.06    | SPCC320.06    | conserved fungal protein                                                 |
| SPCC320.14    | sry1          | serine racemase Sry1                                                     |
| SPCC330.02    | rhp7          | Rad7 homolog Rhp7                                                        |

|             |             |                                                                         |
|-------------|-------------|-------------------------------------------------------------------------|
| SPCC330.06c | pmp20       | thioredoxin peroxidase Pmp20                                            |
| SPCC330.07c | SPCC330.07c | membrane transporter (predicted)                                        |
| SPCC330.11  | btb1        | BTB/POZ domain protein Btb1                                             |
| SPCC330.12c | sdh3        | succinate dehydrogenase (ubiquinone) cytochrome b subunit (predicted)   |
| SPCC330.14c | rpl2402     | 60S ribosomal protein L24 (predicted)                                   |
| SPCC338.02  | mug112      | Schizosaccharomyces pombe specific protein Mug112                       |
| SPCC338.04  | cid2        | caffeine induced death protein Cid2                                     |
| SPCC338.11c | rrg1        | protein-lysine N-methyltransferase Rrg1 (predicted)                     |
| SPCC338.16  | pof3        | F-box protein Pof3                                                      |
| SPCC338.18  | SPCC338.18  | Schizosaccharomyces pombe specific protein                              |
| SPCC417.07c | mto1        | MT organizer Mto1                                                       |
| SPCC4B3.02c | SPCC4B3.02c | Golgi transport protein Got1 (predicted)                                |
| SPCC4B3.03c | SPCC4B3.03c | mitochondrial morphology protein (predicted)                            |
| SPCC4B3.06c | SPCC4B3.06c | NADPH-dependent FMN reductase (predicted)                               |
| SPCC4B3.07  | nro1        | negative regulator of Ofd1, Nro1                                        |
| SPCC4B3.08  | lsg1        | Lsk1 complex gamma subunit (predicted)                                  |
| SPCC4B3.11c | fra3        | mitochondrial transcriptional repressor protein BOLA domain (predicted) |
| SPCC4B3.12  | set9        | histone lysine H3-K20 methyltransferase Set9                            |
| SPCC4B3.13  | SPCC4B3.13  | MatE family transporter (predicted)                                     |
| SPCC4G3.04c | coq5        | C-methyltransferase (predicted)                                         |
| SPCC4G3.10c | rhp42       | DNA repair protein Rhp42                                                |
| SPCC550.01c | coa4        | mitochondrial respiratory chain complex assembly protein (predicted)    |
| SPCC550.03c | SPCC550.03c | Ski complex RNA helicase Ski2 (predicted)                               |
| SPCC550.08  | SPCC550.08  | N-acetyltransferase (predicted)                                         |
| SPCC550.09  | SPCC550.09  | peroxin Pex32 (predicted)                                               |
| SPCC550.10  | atd3        | aldehyde dehydrogenase Atd3 (predicted)                                 |
| SPCC550.11  | SPCC550.11  | karyopherin (predicted)                                                 |
| SPCC550.15c | SPCC550.15c | ribosome biogenesis protein (predicted)                                 |
| SPCC553.01c | dbl2        | meiotic chromosome segregation protein Dbl2                             |
| SPCC553.03  | pex1        | AAA family ATPase Pex1 (predicted)                                      |
| SPCC553.12c | SPCC553.12c | transmembrane transporter (predicted)                                   |
| SPCC584.03c | SPCC584.03c | Ran GTP-binding protein (predicted)                                     |
| SPCC584.13  | SPCC584.13  | amino acid permease (predicted)                                         |
| SPCC584.15c | SPCC584.15c | arrestin/PY protein 2                                                   |
| SPCC584.16c | SPCC584.16c | Schizosaccharomyces specific protein                                    |
| SPCC594.01  | SPCC594.01  | DUF1769 family protein                                                  |
| SPCC594.02c | SPCC594.02c | conserved fungal protein                                                |
| SPCC594.06c | SPCC594.06c | vacuolar SNARE Vam7 (predicted)                                         |
| SPCC594.07c | bqt3        | bouquet formation protein Bqt3                                          |
| SPCC61.03   | SPCC61.03   | NADHX dehydratase (predicted)                                           |
| SPCC61.05   | SPCC61.05   | S. pombe specific multicopy membrane protein family 1                   |
| SPCC613.01  | SPCC613.01  | membrane transporter (predicted)                                        |

|             |             |                                                                                                  |
|-------------|-------------|--------------------------------------------------------------------------------------------------|
| SPCC613.02  | SPCC613.02  | membrane transporter (predicted)                                                                 |
| SPCC613.06  | rpl902      | 60S ribosomal protein L9                                                                         |
| SPCC613.12c | raf1        | CLRC ubiquitin E3 ligase complex specificity factor Raf1/Dos1                                    |
| SPCC622.01c | SPCC622.01c | dubious                                                                                          |
| SPCC622.08c | hta1        | histone H2A alpha                                                                                |
| SPCC622.12c | gdh1        | NADP-specific glutamate dehydrogenase Gdh1 (predicted)                                           |
| SPCC622.14  | SPCC622.14  | GTPase activating protein (predicted)                                                            |
| SPCC622.15c | SPCC622.15c | Schizosaccharomyces specific protein                                                             |
| SPCC622.16c | epe1        | Jmj4 domain chromatin associated protein Epe1                                                    |
| SPCC622.17  | apn1        |                                                                                                  |
| SPCC622.19  | jmj4        | Jmj4 protein (predicted)                                                                         |
| SPCC63.03   | SPCC63.03   | DNAJ domain protein, DNAJC11 family                                                              |
| SPCC63.04   | mok14       | alpha-1,4-glucan synthase Mok14                                                                  |
| SPCC63.06   | SPCC63.06   | human WDR89 family WD repeat protein                                                             |
| SPCC63.14   | eis1        | eisosome assembly protein eis1                                                                   |
| SPCC645.07  | rgf1        | RhoGEF for Rho1, Rgf1                                                                            |
| SPCC645.08c | snd1        | RNA-binding protein, involved in chromatin silencing by small RNA, Snd1                          |
| SPCC645.11c | mug117      | conserved fungal protein Mug117                                                                  |
| SPCC645.12c | SPCC645.12c | Schizosaccharomyces specific protein                                                             |
| SPCC645.13  | SPCC645.13  | transcription elongation regulator/ ubiquitin-protein ligase (predicted)                         |
| SPCC663.03  | pmd1        | leptomycin efflux transporter Pmd1                                                               |
| SPCC736.04c | gma12       | alpha-1,2-galactosyltransferase Gma12                                                            |
| SPCC736.07c | SPCC736.07c | unconventional prefoldin involved in translation initiation (predicted)                          |
| SPCC736.09c | SPCC736.09c | TRAX                                                                                             |
| SPCC736.13  | SPCC736.13  | short chain dehydrogenase (predicted)                                                            |
| SPCC737.06c | SPCC737.06c | glutamate-cysteine ligase regulatory subunit (predicted)                                         |
| SPCC74.02c  | ppn1        | PNUTS homologue, mRNA cleavage and polyadenylation specificity factor complex associated protein |
| SPCC757.05c | SPCC757.05c | peptidase family M20 protein                                                                     |
| SPCC757.07c | ctt1        | catalase                                                                                         |
| SPCC757.09c | rnc1        | RNA-binding protein that suppresses calcineurin deletion Rnc1                                    |
| SPCC757.12  | SPCC757.12  | alpha-amylase homolog (predicted)                                                                |
| SPCC777.03c | SPCC777.03c | nifs homolog, possible cysteine desulfurase                                                      |
| SPCC777.13  | vps35       | retromer complex subunit Vps35                                                                   |
| SPCC777.15  | SPCC777.15  | tRNA dihydrouridine synthase Dus4 (predicted)                                                    |
| SPCC794.09c | tef101      | translation elongation factor EF-1 alpha Ef1a-a                                                  |
| SPCC794.11c | ent3        | ENTH/VHS domain protein Ent3 (predicted)                                                         |
| SPCC825.04c | naa40       | histone N-acetyltransferase Naa40 (predicted)                                                    |
| SPCC825.05c | pwi1        | splicing coactivator SRRM1 (predicted)                                                           |
| SPCC895.07  | alp14       | TOG ortholog Alp14                                                                               |
| SPCC895.09c | ucp12       | ATP-dependent RNA helicase Ucp12 (predicted)                                                     |
| SPCC962.04  | rps1201     | 40S ribosomal protein S12 (predicted)                                                            |
| SPCC970.05  | rpl3601     | 60S ribosomal protein L36                                                                        |

|               |               |                                                                                             |
|---------------|---------------|---------------------------------------------------------------------------------------------|
| SPCP25A2.02c  | rhp26         | SNF2 family helicase Rhp26                                                                  |
| SPCP31B10.07  | eft202        | translation elongation factor 2 (EF-2) Eft2,B                                               |
| SPCPB16A4.02c | SPCPB16A4.02c | conserved fungal protein                                                                    |
| SPCPB16A4.03c | ade10         | bifunctional IMP<br>cyclohydrolase/phosphoribosylaminoimidazolecarboxamideformyltransferase |
| SPCPB16A4.04c | trm8          | tRNA (guanine-N7-)-methyltransferase catalytic subunit Trm8 (predicted)                     |
| SPCPB16A4.05c | SPCPB16A4.05c | urease accessory protein UREG (predicted)                                                   |
| SPCPB16A4.06c | SPCPB16A4.06c | Schizosaccharomyces specific protein                                                        |
